# Supplementary material for: Enhancing long short-term memory (LSTM)-based streamflow prediction with a spatially distributed approach
Source: Copernicus journal article supplement (doi:10.5194/hess-28-2107-2024), 2024-05-14
Supplement: Supplementary file 1 [file hess-28-2107-2024-supplement.pdf]

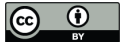

*Supplement of*

## **Enhancing long short-term memory (LSTM)-based streamflow prediction with a spatially distributed approach**

**Qitong Yu et al.**

*Correspondence to:* Qitong Yu ([q45yu@uwaterloo.ca](mailto:q45yu@uwaterloo.ca))

The copyright of individual parts of the supplement might differ from the article licence.

## S1 Map of the streamflow gauging stations

Figure S1 below shows the modelled gauging station locations (by watershed outlet location). Notably, it emphasizes the positions of non-GRIP-GL stations in comparison to GRIP-GL stations.

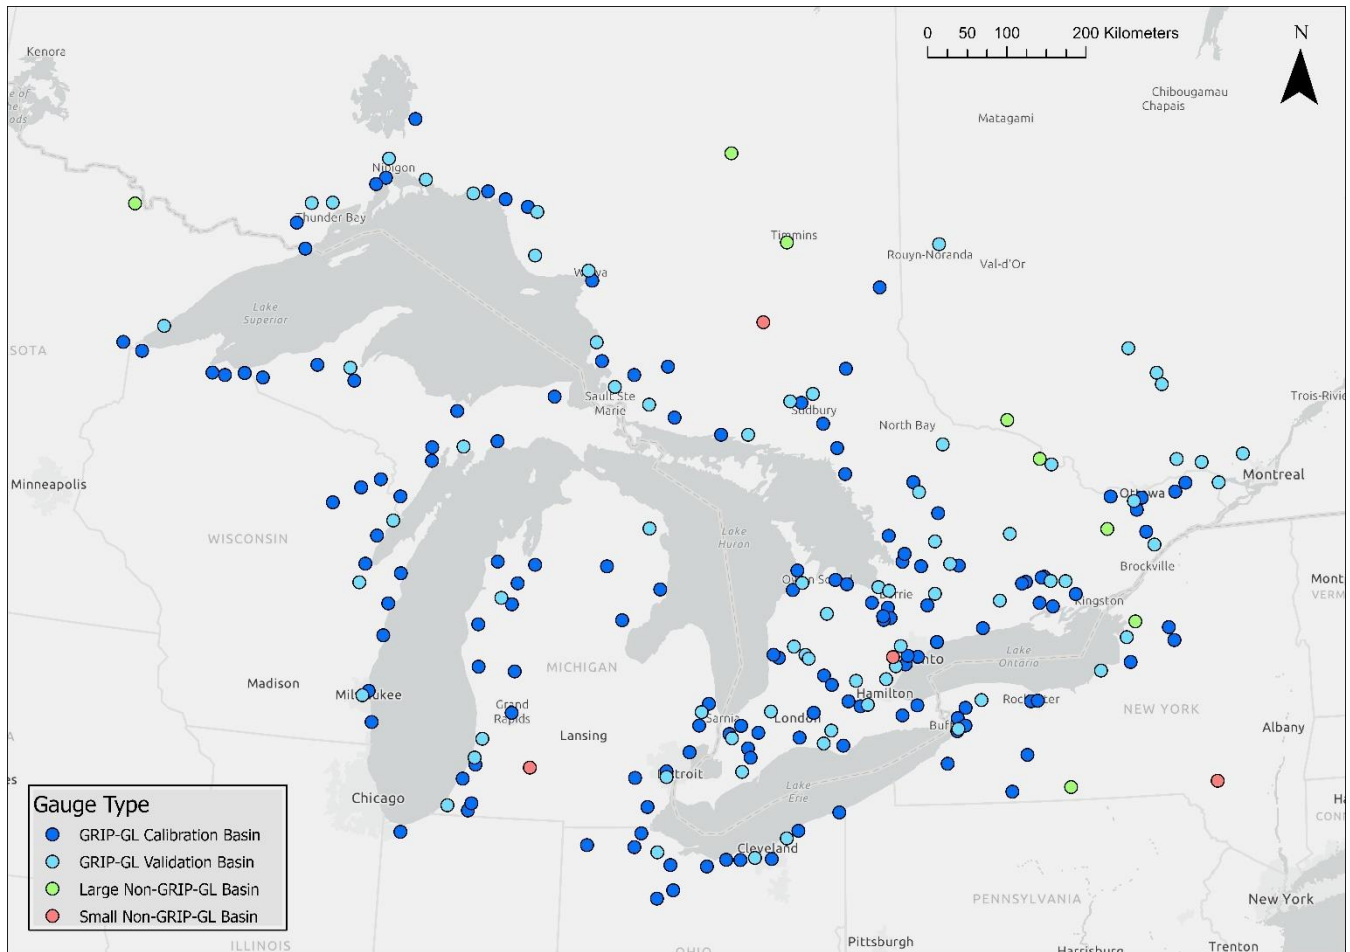

- 5 **Figure S1.** Locations of the streamflow gauging stations used in this study. In total, there are 224 streamflow gauging stations (shown as dots in the map). The 212 stations used in the GRIP-GL study are shown in dark blue dots (calibration) and light blue dots (validation). The stations of the 4 small Non-GRIP-GL basins (described in Sec 3.1 of the main article) are shown in light red dots, and the stations of the 8 large Non-GRIP-GL basins (described in Sec 3.2 of the main article) are shown in light green dots.

## S2 Raven configurations for the routing-only mode

- 10 The routing-only model is defined within the Raven hydrologic modelling framework (Craig et al., 2020). It takes the LSTM-predicted subbasin-level streamflow as inputs, and then simulates the water routing through the delineated lake-river network. The mean daily subbasin-level streamflow is taken as precipitation at the hourly time-step (24 hours of constant

precipitation intensity rate) and the precipitation in each subbasin is instantly flushed to the subbasin outlet. This approach ensures there is no in-catchment routing delay in the simulation, as would normally occur in a typical routing application that move surface runoff across a subbasin into the channel with a unit hydrograph. The model combines this subbasin-level streamflow at the subbasin outlet with in-channel routed streamflow that entered the subbasin from upstream subbasins. Figure S2 below shows the structure of the .rvi file (the primary input file of Raven) that defines the routing-only model.

```
# -----  
# Raven Input file  
# -----  
:StartDate          2001-01-01 00:00:00  
:EndDate            2017-12-31 00:00:00  
:Method              ORDERED_SERIES  
:TimeStep            01:00:00  
:RunName             02HC017  
  
:CatchmentRoute      ROUTE_DUMP  
:Routing              ROUTE_DIFFUSIVE_WAVE  
:PrecipIceptFract    PRECIP_ICEPT_NONE  
:PotentialMeltMethod POTMELT_NONE  
:SoilModel            SOIL_ONE_LAYER  
  
:HydrologicProcesses  
:Precipitation        PRECIP_RAVEN          ATMOS_PRECIP      PONDED_WATER  
:Flush                 RAVEN_DEFAULT          PONDED_WATER      SURFACE_WATER  
:EndHydrologicProcesses  
  
:EvaluationMetrics          NASH_SUTCLIFFE      PCT_BIAS      KLING_GUPTA  
  
:EvaluationPeriod TRAINING 2001-01-01 2010-12-31  
:EvaluationPeriod TESTING 2011-01-01 2017-12-31
```

**Figure S2.** The .rvi file structure for implementing the routing-only setup in this study.

20 The ‘:CatchmentRoute’ command specifies the in-catchment routing method, which is used to represent how water is transported from the subbasin tributaries to the subbasin outlets. Since subbasins are the smallest response unit in this study, we choose the ‘ROUTE\_DUMP’ algorithm as the in-catchment routing method, in which all of the water is instantly dumped to the subbasin outlet.

25 The ‘:Routing’ command specifies the in-channel routing method, which is used to represent how water is transported from upstream to downstream within the primary subbasin channels. We choose the ‘ROUTE\_DIFFUSIVE\_WAVE’ algorithm as the in-channel routing method, which applies an analytical solution to the diffusive wave equation through the reach using a constant reference celerity (Raven Development Team, 2023).

The ‘:PrecipIceptFract’ command specifies the method for estimating the fraction of precipitation intercepted by canopy. Since the LSTM-predicted subbasin-level streamflow inputs are taken as precipitation in Raven, we used the  
30 ‘PRECIP\_ICEPT\_NONE’ algorithm to indicate that there are no canopy interception processes.

The ‘:PotentialMeltMethod’ command specifies the method for estimating the potential snow melt. We adopted the ‘POTMELT\_NONE’ algorithm because snow melt processes are not considered in the routing-only mode.

The ‘:SoilModel’ command specifies the soil structure model used for routing. We used the ‘SOIL\_ONE\_LAYER’ mode which defines single soil layer structure. It is worth mentioning that soil water is not simulated in the routing-only mode but  
35 Raven requires an input for the ‘:SoilModel’ option, even if it is not used.

The ‘:HydrologicProcesses’ block defines the hydrologic processes to be simulated. The routing-only mode only included two hydrologic processes, ‘:Precipitation’ and ‘:Flush’. As mentioned previously, the subbasin-level streamflow inputs are taken to mimic precipitation, and then flushed on the land surface to the stream reach.

```
#-----  
# This is a Raven lake rvh file generated  
# by BasinMaker v2.0  
#-----  
#####  
# New Lake starts  
#####  
:Reservoir   Lake_108369  
  :SubBasinID 3047150  
  :HRUID      26  
  :Type       RESROUTE_STANDARD  
  :WeirCoefficient 0.6  
  :CrestWidth  10.7983  
  :MaxDepth   12.7  
  :LakeArea    7515656.781559977  
  :SeepageParameters 0 0  
:EndReservoir
```

40 **Figure S3.** The .rvh file structure for representing lakes/reservoirs in the routing model.

Furthermore, the routing-only model is configured to simulate lakes/reservoirs (water levels and outflows) with a surface area greater than 5 km<sup>2</sup>. Figure S3 shows the Raven command block that define a lake/reservoir in the routing network, the command block is automatically generated by the BasinMaker library (Han et al., 2023). All lakes are assumed to be vertically prismatic and are simulated with a lake outlet structure that is a broad-crested weir. Raven applies Equation S1  
45 below to simulate the lake/reservoir outflow:

$$Q(s) = \frac{2}{3} \sqrt{2g} * C * L * s^{3/2} \tag{S1}$$

Where  $g$  is the gravitational constant,  $C$  represents the weir coefficient,  $L$  is the crest width, and  $s$  is the lake stage relative to the weir crest elevation. All lakes are initialized with a water level of zero. The weir coefficient is a fixed value of 0.6. The crest width is assigned with a region-dependent value according to the delineation methodology employed in the BasinMaker library. Each lake is represented by its corresponding ‘lake subbasin’ in the routing network and there are no channels within the lake subbasin. All lake inlets are defined as upstream subbasin outlets, and the single lake outlet corresponds to the lake subbasin outlet.

### 55 S3 Lumped LSTM configurations

Recall that the lumped LSTM is a replicate of the LSTM built for the GRIP-GL study (Mai et al., 2022) and the settings/input description below is taken from the supplemental information from that study.

**Table S1.** Hyperparameter settings used for the lumped LSTM.

| Hyperparameter             | value/range                                                   |
|----------------------------|---------------------------------------------------------------|
| Hidden size                | 256                                                           |
| Batch size                 | 64                                                            |
| Epochs                     | 30                                                            |
| Learning rate <sup>1</sup> | ( <b>0</b> : 0.0005, <b>20</b> : 0.0001, <b>30</b> : 0.00005) |
| Sequence length            | 365 days                                                      |
| Dropout                    | 0.4                                                           |
| Loss function              | Nash-Sutcliffe efficiency (NSE) <sup>2</sup>                  |

60 <sup>1</sup>(**0**:  $x_1$ , **5**:  $x_2$ , **10**:  $x_3$ ) denotes learning rate  $x_1$  for epoch 0 to 4, learning rate  $x_2$  for epoch 5 to 9, and learning rate  $x_3$  after epoch 10.

<sup>2</sup>Basin-averaged NSE loss – the average of the NSE values across the calibration/training basins (Kratzert et al., 2019).

The loss function is shown in Equation S2 below:

$$65 \text{ NSE} = \frac{1}{B} + \sum_{b=1}^B \sum_{n=1}^N \frac{(\hat{y}_n - y_n)^2}{(s(b) + \epsilon)^2} \quad (\text{S2})$$

Where  $B$  is the number of basins,  $N$  is the number of samples (days) per basin  $B$ ,  $\hat{y}_n$  is the prediction of sample  $n$  ( $1 \leq n \leq N$ ),  $y_n$  is the observation, and  $s(b)$  is the standard deviation of the discharge in basin  $b$  ( $1 \leq b \leq B$ ), calculated from the training period (Kratzert et al., 2019).

70

The input variables required to drive the LSTM are grouped into dynamic attributes (Table S2) computed at the daily time step, and static attributes (Table S3) which are taken as constant through the LSTM training period.

75 **Table S2.** CaSR-v2/RDRS-v2 forcing variables used for the lumped LSTM. For initial lumped LSTM training, these variables are derived for each of the gauged basins. For the SR-model, these variables are derived for each of subbasins in the routing network.

| Variable name                      | Unit             |
|------------------------------------|------------------|
| Quantity of precipitation          | m                |
| Downward solar flux                | W/m <sup>2</sup> |
| Minimum air temperature            | °C               |
| Maximum air temperature            | °C               |
| Specific humidity                  | kg/kg            |
| U wind component                   | kts              |
| V wind component                   | kts              |
| Surface pressure                   | mb               |
| Potential evapotranspiration (PET) | mm/day           |

**Table S3.** Static attributes defining lumped LSTM input variables. For initial lumped LSTM training, these variables are derived for each of the gauged basins. For the SR-model, these variables are derived for each of subbasins in the routing network.

| Attribute Name                                                                           | Unit            |
|------------------------------------------------------------------------------------------|-----------------|
| Mean daily precipitation                                                                 | mm/day          |
| Mean daily PET                                                                           | mm/day          |
| Aridity (ratio of mean PET to mean precipitation)                                        | -               |
| Mean daily temperature                                                                   | °C              |
| Fraction of precipitation falling on days with mean daily temperatures below 0°C         | -               |
| Frequency of days with high precipitation ( $\geq 5$ times the mean daily precipitation) | days/year       |
| Average duration of high-precipitation events                                            | days            |
| Frequency of dry days (daily precipitation less than 1 mm/day)                           | days/year       |
| Average duration of dry periods                                                          | days            |
| Catchment mean elevation                                                                 | meter           |
| Standard deviation of catchment elevation                                                | meter           |
| Catchment mean slope                                                                     | meter/kilometre |
| Standard deviation of catchment slope                                                    | meter/kilometre |

|                                                                        |                   |
|------------------------------------------------------------------------|-------------------|
| Catchment area                                                         | km <sup>2</sup>   |
| Fraction of land covered by ‘Temperate-or-sub-polar-needleleaf-forest’ | -                 |
| Fraction of land covered by ‘Temperate-or-sub-polar-grassland’         | -                 |
| Fraction of land covered by ‘Temperate-or-sub-polar-shrubland’         | -                 |
| Fraction of land covered by ‘Temperate-or-sub-polar-grassland’         | -                 |
| Fraction of land covered by ‘Mixed-Forest’                             | -                 |
| Fraction of land covered by ‘Wetland’                                  | -                 |
| Fraction of land covered by ‘Cropland’                                 | -                 |
| Fraction of land covered by ‘Barren-Lands’                             | -                 |
| Fraction of land covered by ‘Urban-and-Built-up’                       | -                 |
| Fraction of land covered by ‘Water’                                    | -                 |
| Soil bulk density                                                      | g/cm <sup>3</sup> |
| Soil clay content                                                      | % of weight       |
| Soil gravel content                                                    | % of volume       |
| Soil organic carbon                                                    | % of weight       |
| Soil sand content                                                      | % of weight       |
| Soil silt content                                                      | % of weight       |

---

## 80 **References**

- Craig, J. R., Brown, G., Chlumsky, R., Jenkinson, R. W., Jost, G., Lee, K., Mai, J., Serrer, M., Sgro, N., Shafii, M., Snowdon, A. P., and Tolson, B. A.: Flexible watershed simulation with the Raven hydrological modelling framework, *Environmental Modelling & Software*, 129, 104728, <https://doi.org/10.1016/J.ENVSOFT.2020.104728>, 2020.
- 85 Han, M., Shen, H., Tolson, B. A., Craig, J. R., Mai, J., Lin, S. G. M., Basu, N. B., and Awol, S.: BasinMaker 3.0: A GIS toolbox for distributed watershed delineation of complex lake-river routing networks, <https://doi.org/10.5281/zenodo.6536085&https>, 2023.
- Kratzert, F., Klotz, D., Shalev, G., Klambauer, G., Hochreiter, S., and Nearing, G.: Towards learning universal, regional, and local hydrological behaviors via machine learning applied to large-sample datasets, *Hydrol Earth Syst Sci*, 23, 5089–5110, <https://doi.org/10.5194/hess-23-5089-2019>, 2019.
- 90

- Mai, J., Shen, H., Tolson, B. A., Gaborit, É., Arsenault, R., Craig, J. R., Fortin, V., Fry, L. M., Gauch, M., Klotz, D., Kratzert, F., O'Brien, N., Princz, D. G., Rasiya Koya, S., Roy, T., Seglenieks, F., Shrestha, N. K., Temgoua, A. G. T., Vionnet, V., and Waddell, J. W.: The Great Lakes Runoff Intercomparison Project Phase 4: The Great Lakes (GRIP-GL), *Hydrol Earth Syst Sci*, 26, 3537–3572, <https://doi.org/10.5194/hess-26-3537-2022>, 2022.
- 95 Raven Development Team.: Raven: User's and Developer's Manual v3.7: <http://raven.uwaterloo.ca/>, 2023. last access: 21 January 2024.
